# Supplementary material
Source: HighWire-hosted journal article supplement (https://bmjopen.bmj.com/content/7/11/e017775)
Supplement: inline-supplementary-material-2 [file inline-supplementary-material-2.pdf]

Appendix 2. Cross table describing patterns of health care use and demographics of top-2-5% beneficiaries.

| ICD10-chapter                                                                                       | Prevalence | % most cost incurring ICD10-chapter | Average age | Percentage dying | Percentage men | Average number of comor (ICD-chapter) | Average cost (*€1000) | Expensive drugs (*€1000) | Intensive care (*€1000) | Neoplasm (*€1000) | Mental and behavioural disorders (*€1000) | Diseases circulatory system (*€1000) | Diseases musculoskeletal system (*€1000) |
|-----------------------------------------------------------------------------------------------------|------------|-------------------------------------|-------------|------------------|----------------|---------------------------------------|-----------------------|--------------------------|-------------------------|-------------------|-------------------------------------------|--------------------------------------|------------------------------------------|
| Certain infectious and parasitic diseases                                                           | 6.3%       | 3.2%                                | 53.6        | 5.0%             | 70.8%          | 3.4                                   | 15                    | 794                      | 1,597                   | 656               | 723                                       | 955                                  | 432                                      |
| Neoplasms                                                                                           | 27.4%      | 13.0%                               | 65.9        | 14.8%            | 46.8%          | 3.2                                   | 17                    | 28,980                   | 6,602                   | 224,741           | 2,120                                     | 6,267                                | 2,829                                    |
| Diseases of the blood and blood-forming organs and certain disorders involving the immune mechanism | 2.4%       | 0.6%                                | 57.3        | 5.7%             | 46.6%          | 4.1                                   | 16                    | 2,138                    | 242                     | 244               | 124                                       | 351                                  | 157                                      |
| Endocrine, nutritional and metabolic diseases                                                       | 20.2%      | 2.9%                                | 42.3        | 2.0%             | 38.0%          | 3.4                                   | 15                    | 6,748                    | 1,122                   | 518               | 1,051                                     | 955                                  | 662                                      |
| Mental and behavioural disorders                                                                    | 26.6%      | 13.1%                               | 41.1        | 1.0%             | 48.4%          | 2.6                                   | 16                    | 4,216                    | 2,067                   | 1,597             | 217,204                                   | 3,339                                | 3,022                                    |
| Diseases of the nervous system                                                                      | 23.4%      | 2.8%                                | 52.9        | 4.5%             | 44.7%          | 3.7                                   | 16                    | 5,475                    | 1,737                   | 617               | 1,071                                     | 1,575                                | 949                                      |
| Diseases of the eye and adnexa                                                                      | 19.2%      | 1.5%                                | 71.9        | 1.5%             | 42.4%          | 3.7                                   | 14                    | 4,875                    | 194                     | 494               | 201                                       | 790                                  | 487                                      |
| Diseases of the ear and mastoid process                                                             | 4.9%       | 0.4%                                | 48.4        | 1.1%             | 50.5%          | 3.4                                   | 14                    | 654                      | 70                      | 72                | 176                                       | 116                                  | 88                                       |
| Diseases of the circulatory system                                                                  | 40.3%      | 16.0%                               | 69.3        | 8.1%             | 56.4%          | 3.7                                   | 17                    | 5,085                    | 17,064                  | 5,430             | 3,416                                     | 267,652                              | 4,555                                    |
| Diseases of the respiratory system                                                                  | 19.2%      | 4.7%                                | 66.6        | 13.0%            | 48.3%          | 3.9                                   | 16                    | 4,054                    | 6,835                   | 2,491             | 1,582                                     | 4,232                                | 1,431                                    |
| Diseases of the digestive system                                                                    | 15.7%      | 6.1%                                | 57.0        | 5.3%             | 44.4%          | 3.7                                   | 16                    | 28,002                   | 5,754                   | 2,491             | 1,971                                     | 3,481                                | 1,937                                    |
| Diseases of the skin and subcutaneous tissue                                                        | 8.2%       | 1.1%                                | 58.7        | 3.5%             | 50.9%          | 3.5                                   | 15                    | 8,449                    | 217                     | 271               | 250                                       | 566                                  | 336                                      |
| Diseases of the musculoskeletal system and connective tissue                                        | 27.4%      | 13.4%                               | 62.8        | 0.6%             | 35.1%          | 3.1                                   | 15                    | 55,769                   | 1,011                   | 2,948             | 2,428                                     | 5,520                                | 187,982                                  |
| Diseases of the genitourinary system                                                                | 17.0%      | 4.5%                                | 59.3        | 4.8%             | 43.9%          | 3.8                                   | 15                    | 3,545                    | 1,993                   | 2,235             | 1,259                                     | 2,411                                | 1,445                                    |
| Pregnancy, childbirth and the puerperium                                                            | 4.0%       | 3.2%                                | 31.0        | 0.0%             | 0.0%           | 2.7                                   | 13                    | 884                      | 564                     | 178               | 1,661                                     | 413                                  | 348                                      |
| Certain conditions originating in the perinatal period                                              | 0.0%       | 0.0%                                | 0.0         | 0.0%             | 37.5%          | 2.6                                   | 18                    | 0                        | 26                      | 0                 | 0                                         | 0                                    | 0                                        |
| Congenital malformations, deformations and chromosomal abnormalities                                | 1.8%       | 0.5%                                | 14.5        | 0.5%             | 54.7%          | 3.0                                   | 16                    | 945                      | 743                     | 63                | 127                                       | 145                                  | 80                                       |
| Symptoms, signs and abnormal clinical and laboratory findings, not elsewhere classified             | 28.2%      | 3.0%                                | 66.4        | 15.1%            | 40.9%          | 4.0                                   | 16                    | 2,223                    | 2,390                   | 1,266             | 1,354                                     | 2,338                                | 1,066                                    |
| Injury, poisoning and certain other consequences of external causes                                 | 15.9%      | 6.1%                                | 67.8        | 9.2%             | 36.4%          | 3.5                                   | 16                    | 1,957                    | 4,388                   | 1,497             | 2,283                                     | 3,554                                | 3,483                                    |
| Factors influencing health status and contact with health services                                  | 24.2%      | 3.9%                                | 37.9        | 0.9%             | 40.8%          | 3.3                                   | 15                    | 3,409                    | 5,022                   | 1,495             | 1,549                                     | 2,180                                | 1,749                                    |
